# Supplementary material for: Identification and validation of an immune-related gene pairs signature for three urologic cancers
Source: publisher site journal article supplement (doi:10.18632/aging.203886), 2022-02-10
Supplement: Supplementary file [file aging-v14i3-203886-supplementary-material-SD2.pdf]

## SUPPLEMENTARY TABLES

**Supplementary Table 1. Details about the data sets used in this study.**

| Accession number                     | Platform                                                | Samples      |
|--------------------------------------|---------------------------------------------------------|--------------|
| <b>Urologic cancer</b>               |                                                         | <b>2,700</b> |
| <b>Bladder Cancer</b>                |                                                         | <b>835</b>   |
| TCGA                                 | Illumina HiSeq                                          | 372          |
| GSE48075                             | Illumina HumanHT-12 V3.0 expression beadchip            | 73           |
| GSE31684                             | Affymetrix Human Genome U133 Plus 2.0 Array             | 93           |
| GSE32894                             | Illumina HumanHT-12 V3.0 expression beadchip            | 224          |
| GSE48276                             | Illumina HumanHT-12 WG-DASL V4.0 R2 expression beadchip | 73           |
| <b>Prostate Cancer</b>               |                                                         | <b>888</b>   |
| TCGA                                 | Illumina HiSeq                                          | 412          |
| GSE70770                             | Illumina HumanHT-12 V4.0 expression beadchip            | 203          |
| GSE116918                            | Almac Diagnostics Prostate Disease Specific Array (DSA) | 248          |
| ICGC-PRAD-FR                         | Illumina HiSeq                                          | 25           |
| <b>Kidney cancer</b>                 |                                                         | <b>977</b>   |
| TCGA Kidney Clear Cell Carcinoma     | Illumina HiSeq                                          | 503          |
| TCGA Kidney Papillary Cell Carcinoma | Illumina HiSeq                                          | 276          |
| TCGA Kidney Chromophobe Carcinoma    | Illumina HiSeq                                          | 59           |
| GSE22541                             | Affymetrix Human Genome U133 Plus 2.0 Array             | 48           |
| ICGC-RECA-EU                         | Illumina HiSeq                                          | 91           |

**Supplementary Table 2. Model information about the IRGPI.**

| IRG 1  | Full name                                         | Immune processes | IRG 2   | Full name                                        | Immune processes                    | Coefficient        |
|--------|---------------------------------------------------|------------------|---------|--------------------------------------------------|-------------------------------------|--------------------|
| FASLG  | Fas ligand                                        | Multiple         | FGF5    | fibroblast growth factor 5                       | Cytokines                           | 0.611523169778837  |
| JAK2   | Janus kinase 2                                    | Antimicrobials   | IL15RA  | interleukin 15 receptor subunit alpha            | Multiple                            | 0.333805374153765  |
| IREB2  | iron responsive element binding protein 2         | Antimicrobials   | NEDD4   | NEDD4 E3 ubiquitin protein ligase                | Antimicrobials                      | 0.557427035341619  |
| BST2   | bone marrow stromal cell antigen 2                | Antimicrobials   | SLC40A1 | solute carrier family 40 member 1                | Antimicrobials                      | -0.343127675750891 |
| BIRC5  | baculoviral IAP repeat containing 5               | Antimicrobials   | IL11RA  | interleukin 11 receptor subunit alpha            | Multiple                            | 0.120504722606519  |
| IL5RA  | interleukin 5 receptor subunit alpha              | Multiple         | PDIA2   | protein disulfide isomerase family A member 2    | Antigen_Processing_and_Presentation | 0.342856072023345  |
| RSAD2  | radical S-adenosyl methionine domain containing 2 | Antimicrobials   | IL13RA2 | interleukin 13 receptor subunit alpha 2          | Multiple                            | 0.678808880744686  |
| BIRC5  | baculoviral IAP repeat containing 5               | Antimicrobials   | NR4A3   | nuclear receptor subfamily 4 group A member 3    | Cytokine_Receptors                  | -0.291520461858733 |
| CXCL5  | C-X-C motif chemokine ligand 5                    | Multiple         | PLAU    | plasminogen activator, urokinase                 | Multiple                            | -0.806211590266488 |
| PDGFRA | platelet derived growth factor receptor alpha     | Multiple         | GNAI1   | G protein subunit alpha i1                       | Antimicrobials                      | -0.279543844347446 |
| IL21R  | interleukin 21 receptor                           | Multiple         | KLRD1   | killer cell lectin like receptor D1              | Multiple                            | -0.280214943593435 |
| FABP3  | fatty acid binding protein 3                      | Antimicrobials   | LTB4R   | leukotriene B4 receptor                          | Multiple                            | 0.194642442980463  |
| IFIH1  | interferon induced with helicase C domain 1       | Antimicrobials   | IL1RAP  | interleukin 1 receptor accessory protein         | Multiple                            | 0.185869442713303  |
| BIRC5  | baculoviral IAP repeat containing 5               | Antimicrobials   | MAP3K8  | mitogen-activated protein kinase kinase kinase 8 | TCRsignaling Pathway                | -0.129389559702631 |

|         |                                               |                    |           |                                               |                    |                         |
|---------|-----------------------------------------------|--------------------|-----------|-----------------------------------------------|--------------------|-------------------------|
| BIRC5   | baculoviral IAP repeat containing 5           | Antimicrobials     | SEMA3F    | semaphorin 3F                                 | Multiple           | -0.072138438403510      |
| IL1RAP  | interleukin 1 receptor accessory protein      | Multiple           | NR3C2     | nuclear receptor subfamily 3 group C member 2 | Cytokine_Receptors | -<br>0.0912124340222771 |
| SEMA7A  | semaphorin 7A (John Milton Hagen blood group) | Multiple           | SECTM1    | secreted and transmembrane 1                  | Cytokines          | -0.343147031348337      |
| IL20RB  | interleukin 20 receptor subunit beta          | Multiple           | S100A8    | S100 calcium binding protein A8               | Antimicrobials     | -0.396800456172257      |
| LIFR    | LIF receptor subunit alpha                    | Cytokine_Receptors | JAG1      | jagged canonical Notch ligand 1               | Cytokines          | 0.645240142760529       |
| BIRC5   | baculoviral IAP repeat containing 5           | Antimicrobials     | MICB      | MHC class I polypeptide-related sequence B    | Multiple           | -0.071431251596447      |
| BIRC5   | baculoviral IAP repeat containing 5           | Antimicrobials     | TNFRSF10A | TNF receptor superfamily member 10a           | Multiple           | -<br>0.0734371636311053 |
| CCL22   | C-C motif chemokine ligand 22                 | Multiple           | GREM1     | gremlin 1, DAN family BMP antagonist          | Cytokines          | 0.279290394701392       |
| FGF12   | fibroblast growth factor 12                   | Cytokines          | TNFSF4    | TNF superfamily member 4                      | Multiple           | 0.379557014519608       |
| IL13RA2 | interleukin 13 receptor subunit alpha 2       | Multiple           | MPL       | MPL proto-oncogene, thrombopoietin receptor   | Cytokine_Receptors | -0.17903152209123       |
| PCSK1   | proprotein convertase subtilisin/kexin type 1 | Antimicrobials     | NUDT6     | nudix hydrolase 6                             | Cytokines          | -<br>0.0916418175539433 |

**Supplementary Table 3. Univariate and multivariate analyses of prognostic factors in terms of RFS.**

| Datasets        | Variable    | Univariate analysis |                        | Multivariate analysis* |                       |
|-----------------|-------------|---------------------|------------------------|------------------------|-----------------------|
|                 |             | HR (95% CI)         | P Value                | HR (95% CI)            | P Value               |
| Meta-training   | Age         | 1.56(1.28-1.90)     | 1.35×10 <sup>-5</sup>  | 1.18(0.96-1.45)        | 0.11                  |
|                 | Gender      | 1.07(0.86-1.34)     | 0.536                  | -                      | -                     |
|                 | Stage       | 5.05(4.00-6.38)     | < 2×10 <sup>-16</sup>  | 3.22(2.52-4.11)        | < 2×10 <sup>-16</sup> |
|                 | Immune risk | 6.08(4.75-7.77)     | < 2×10 <sup>-16</sup>  | 4.22(3.23-5.52)        | < 2×10 <sup>-16</sup> |
| Meta-validation | Age         | 1.50(1.05-2.15)     | 0.0279                 | 1.36(0.91-2.03)        | 0.135771              |
|                 | Gender      | 0.99(0.69-1.42)     | 0.948                  | -                      | -                     |
|                 | Stage       | 2.96(2.12-4.14)     | 2.01×10 <sup>-10</sup> | 2.94(2.02-4.29)        | 1.82×10 <sup>-8</sup> |
|                 | Immune risk | 2.12(1.55-2.91)     | 2.57×10 <sup>-6</sup>  | 2.15(1.45-3.19)        | 0.000149              |

\*Age, stage and immune risk were adjusted in multivariate analysis.
